# Supplementary material for: Fabrication of a biofuel cell improved by the π-conjugated electron pathway effect induced from a new enzyme catalyst employing terephthalaldehyde
Source: Royal Society of Chemistry journal article supplement (doi:10.1039/c5nr06703k), 2015-11-26
Supplement: c5nr06703k1.pdf [file c5nr06703k1.pdf]

## Supporting Information

### **Fabrication of biofuel cell improved by $\pi$ -conjugated electron pathway effect induced from a new enzyme catalyst employing terephthalaldehyde**

Yongjin Chung, KyuHwan Hyun, and Yongchai Kwon\*

Graduate school of Energy and Environment, Seoul National University of Science and Technology, 232 Gongneung-ro, Nowon-gu, Seoul, 139-743, Republic of Korea

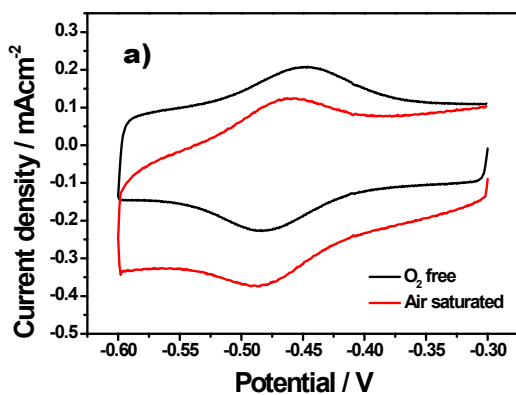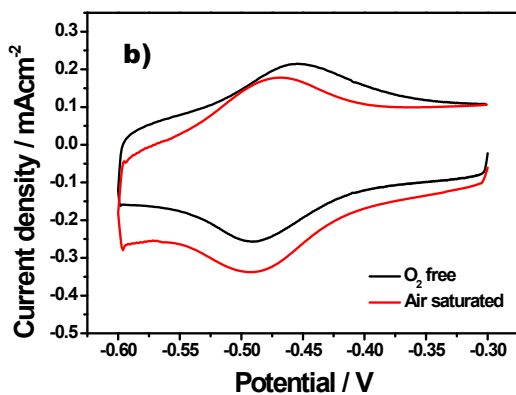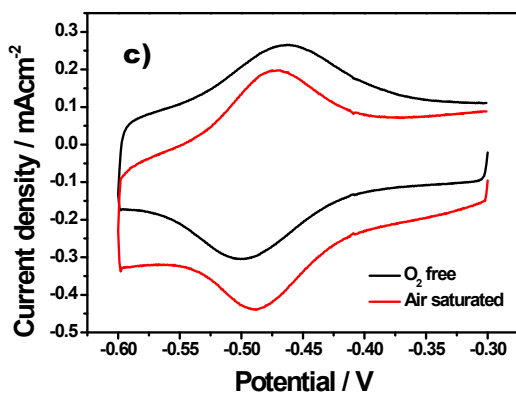

Fig. S1. Cyclic voltammograms of a) GOx/PEI/CNT, b) GA/[GOx/PEI/CNT] and c) TPA/[GOx/PEI/CNT] run at air-saturated state and N<sub>2</sub> state without provision of glucose.

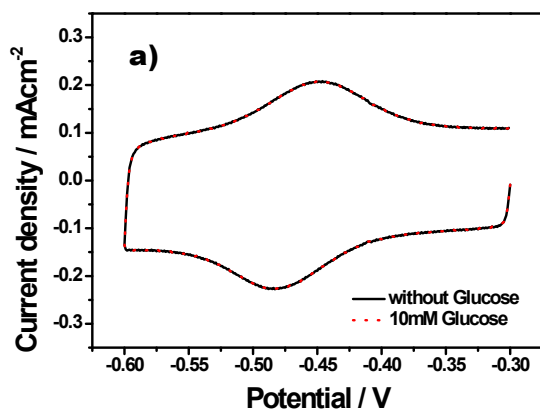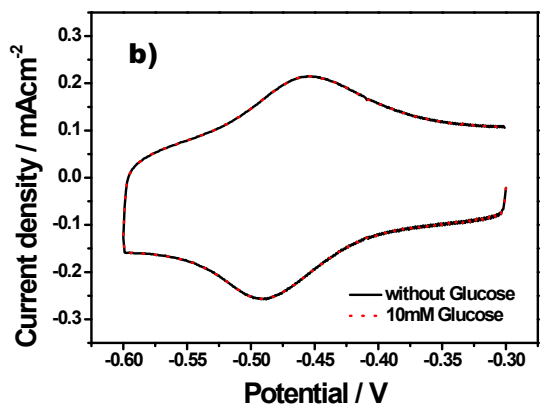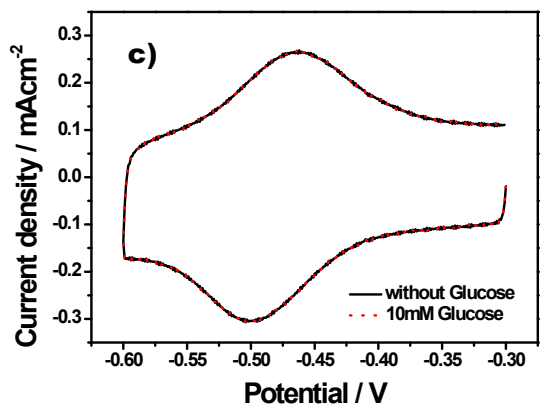

Fig. S2. Cyclic voltammograms of a) GOx/PEI/CNT, b) GA/[GOx/PEI/CNT] and c) TPA/[GOx/PEI/CNT] run at N<sub>2</sub> state with provision of 0 and 10 mM glucose.

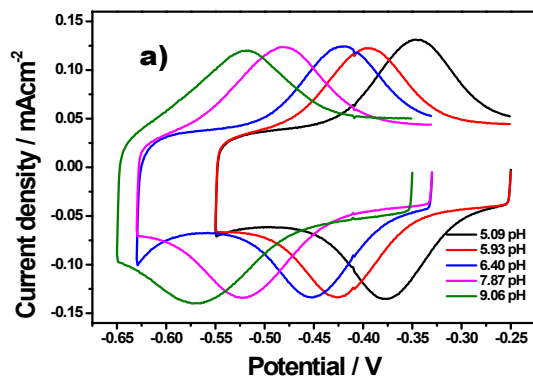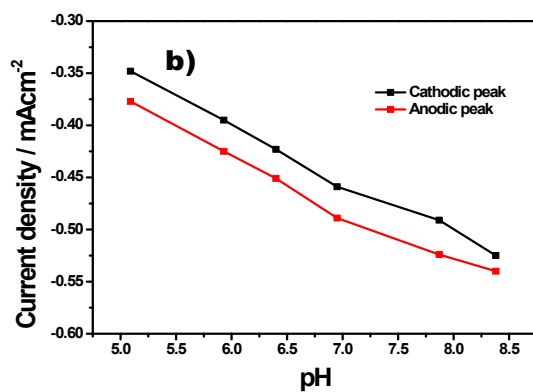

**Figure S3.** a) Cyclic voltammograms of TPA/[GOx/PEI/CNT] run under the condition of different pHs and b) a relationship between electrolyte pH and its peak potential. For the CV tests, 1.0 M PBS (pH 7.4) was used as electrolyte and potential scan rate was  $50\text{mV s}^{-1}$ , while electrolyte pH was varied from 5.09 to 9.06.
